# Supplementary material for: Mixed invasive ductal and lobular carcinoma has distinct clinical features and predicts worse prognosis when stratified by estrogen receptor status
Source: PubMed Central journal article supplement (PMC5583173; doi:10.1038/s41598-017-10789-x), 2017-09-04
Supplement: 41598_2017_10789_MOESM1_ESM.pdf [file 41598_2017_10789_MOESM1_ESM.pdf]

**Mixed invasive ductal and lobular carcinoma has distinct clinical features and predicts worse prognosis when stratified by estrogen receptor status**

Yi Xiao MD<sup>1,2</sup>, Ding Ma MD<sup>1,2</sup>, Miao Ruan MD<sup>2,3</sup>, Shen Zhao MD<sup>1,2</sup>, Xi-Yu Liu MD<sup>1,2</sup>,  
Yi-Zhou Jiang MD<sup>1,2</sup> and Zhi-Ming Shao MD, PhD<sup>1,2,4</sup>

**Authors' Affiliations and Addresses:**

1 Department of Breast Surgery, Fudan University Shanghai Cancer Center; Cancer Institute, Fudan University Shanghai Cancer Center, 399 Ling-Ling Road, Shanghai 200032, People's Republic of China

2 Department of Oncology, Shanghai Medical College, Fudan University, P.R. China

3 Department of Pathology, Fudan University Shanghai Cancer Center, P.R. China.

4 Institutes of Biomedical Sciences, Fudan University, Shanghai, P.R. China

Yi Xiao, Ding Ma and Miao Ruan contributed equally to this work.

**\*Correspondence to:**

Zhi-Ming Shao, MD, PhD or Yi-Zhou Jiang, MD

Department of Breast Surgery, Fudan University Shanghai Cancer Center

Cancer Institute, Fudan University Shanghai Cancer Center;

Department of Oncology, Shanghai Medical College, Fudan University

270 Dong-An Road, Shanghai, 200032, P.R. China

Tel: +86-21-64175590

Fax: +86-21-64434556

Email: [zhimingshao@gmail.com](mailto:zhimingshao@gmail.com) or [yizhoujiang@fudan.edu.cn](mailto:yizhoujiang@fudan.edu.cn)

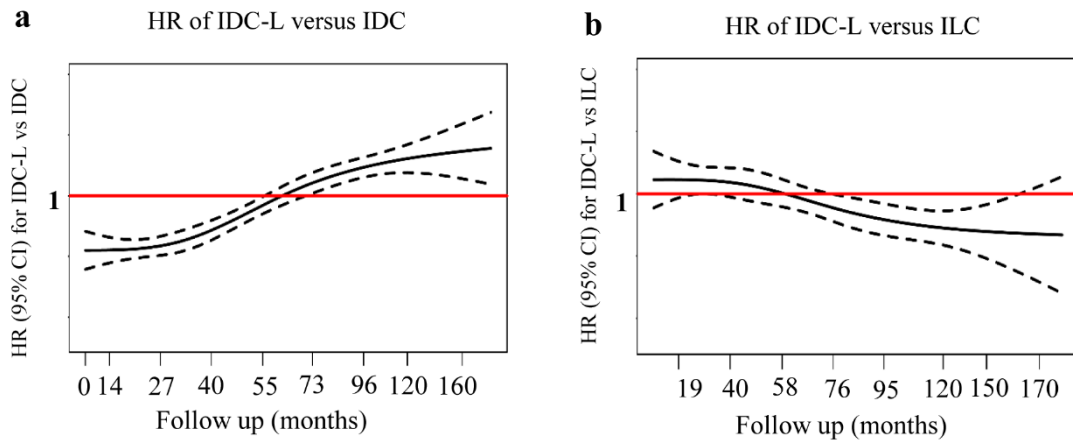

**Supplementary Fig. 1.** Scaled Schoenfeld residuals plots to estimate the change of HR for breast cancer specific death over time for IDC-L versus IDC (a) and IDC-L versus ILC (b). The solid line represents point estimate of HR; the dotted line represents the 95% confidence interval of HR. Abbreviations: HR: hazard ratio; CI: confidence interval; IDC-L: invasive ductal carcinoma with lobular features; IDC: invasive ductal carcinoma; ILC: invasive lobular carcinoma.

**Supplementary Table 1. Univariate Analysis of Breast Cancer Specific Survival (BCSS) and**

**Overall Survival (OS) Predictors Using Cox Proportional Hazards Model**

| Variables                       | BCSS                |        | OS                  |        |
|---------------------------------|---------------------|--------|---------------------|--------|
|                                 | HR (95% CI)         | P      | HR (95% CI)         | P      |
| <b>Histological type</b>        |                     |        |                     |        |
| IDC-L versus IDC                | 1.00 (0.96 to 1.05) | 0.837  | 0.93 (0.90 to 0.97) | <0.001 |
| IDC-L versus ILC                | 0.99 (0.93 to 1.06) | 0.814  | 1.00 (0.95 to 1.05) | 0.970  |
| <b>Year of diagnosis</b>        |                     |        |                     |        |
| 1998-2002                       | 1.24 (1.20 to 1.27) | <0.001 | 1.22 (1.20 to 1.25) | <0.001 |
| 2003-2007                       | Reference           |        |                     |        |
| <b>Age at diagnosis (years)</b> |                     |        |                     |        |
| ≤50                             | 0.89 (0.87 to 0.91) | <0.001 | 0.56 (0.55 to 0.58) | <0.001 |
| >50                             | Reference           |        |                     |        |
| <b>Race</b>                     |                     |        |                     |        |
| Black                           | 1.30 (1.26 to 1.35) | <0.001 | 1.28 (1.24 to 1.32) | <0.001 |
| Others <sup>a</sup>             | 0.87 (0.83 to 0.92) | <0.001 | 0.81 (0.78 to 0.84) | <0.001 |
| White                           | Reference           |        |                     |        |
| <b>Marital status</b>           |                     |        |                     |        |
| Married                         | 0.82 (0.80 to 0.84) | <0.001 | 0.69 (0.67 to 0.70) | <0.001 |
| Unmarried <sup>b</sup>          | Reference           |        |                     |        |
| <b>Grade</b>                    |                     |        |                     |        |
| 1                               | 0.50 (0.47 to 0.53) | <0.001 | 0.28 (0.80 to 0.85) | <0.001 |
| 2                               | Reference           |        |                     |        |
| 3 and UD <sup>c</sup>           | 1.47 (1.43 to 1.52) | <0.001 | 1.23 (1.20 to 1.26) | <0.001 |
| <b>Tumor size (cm)</b>          |                     |        |                     |        |
| <2                              | 0.49 (0.48 to 0.51) | <0.001 | 0.64 (0.62 to 0.65) | <0.001 |
| 2-5                             | Reference           |        |                     |        |
| >5                              | 1.55 (1.49 to 1.60) | <0.001 | 1.49 (1.45 to 1.54) | <0.001 |
| <b>Positive nodes</b>           |                     |        |                     |        |
| 0                               | 0.29 (0.28 to 0.30) | <0.001 | 0.42 (0.41 to 0.44) | <0.001 |
| 1-3                             | 0.57 (0.54 to 0.59) | <0.001 | 0.60 (0.59 to 0.62) | <0.001 |
| 4-9                             | Reference           |        |                     |        |
| ≥10                             | 1.34 (1.29 to 1.40) | <0.001 | 1.40 (1.35 to 1.45) | <0.001 |
| <b>ER status</b>                |                     |        |                     |        |
| Negative                        | 1.36 (1.31 to 1.41) | <0.001 | 1.19 (1.15 to 1.22) | <0.001 |
| Positive                        | Reference           |        |                     |        |
| <b>PR status</b>                |                     |        |                     |        |
| Negative                        | 1.37 (1.32 to 1.42) | <0.001 | 1.23 (1.20 to 1.27) | <0.001 |
| Positive                        | Reference           |        |                     |        |
| <b>Radiation</b>                |                     |        |                     |        |
| No                              | 1.16 (1.13 to 1.20) | <0.001 | 1.29 (1.26 to 1.32) | <0.001 |
| Yes                             | Reference           |        |                     |        |
| <b>Surgery type</b>             |                     |        |                     |        |
| No                              | 1.42 (1.32 to 1.54) | <0.001 | 1.34 (1.25 to 1.44) | <0.001 |
| Lumpectomy                      | 0.85 (0.82 to 0.87) | <0.001 | 0.87 (0.85 to 0.89) | <0.001 |
| Mastectomy                      | Reference           |        |                     |        |

**Note:**

a Including American Indian/Alaskan native, and Asian/Pacific Islander, and others-unspecified.

b Including divorced, separated, single (never married), and widowed.

c Including grade 3 and undifferentiated.

**Abbreviations:** BCSS: breast cancer specific survival; OS: overall survival; HR: hazard ratio; CI: confidence interval; IDC-L: invasive ductal carcinoma with lobular features; IDC: invasive ductal carcinoma; ILC: invasive lobular carcinoma; ER: estrogen receptor; PR: progesterone receptor.

**Supplementary Table 2. Multivariate Analysis of Breast Cancer Specific Survival (BCSS) and Overall Survival (OS) Predictors in ER-positive Patients Using Cox Proportional Hazards Model**

| Variables                       | BCSS                |        | OS                  |        |
|---------------------------------|---------------------|--------|---------------------|--------|
|                                 | HR (95% CI)         | P      | HR (95% CI)         | P      |
| <b>Histological type</b>        |                     |        |                     |        |
| IDC-L versus IDC                | 0.98 (0.93 to 1.03) | 0.472  | 0.91 (0.88 to 0.95) | <0.001 |
| IDC-L versus ILC                | 0.97 (0.91 to 1.05) | 0.489  | 0.99 (0.93 to 1.04) | 0.600  |
| <b>Year of diagnosis</b>        |                     |        |                     |        |
| 1998-2002                       | 1.20 (1.15 to 1.24) | <0.001 | 1.19 (1.16 to 1.22) | <0.001 |
| 2003-2007                       | Reference           |        |                     |        |
| <b>Age at diagnosis (years)</b> |                     |        |                     |        |
| ≤50                             | 0.88 (0.85 to 0.91) | <0.001 | 0.50 (0.48 to 0.51) | <0.001 |
| >50                             | Reference           |        |                     |        |
| <b>Race</b>                     |                     |        |                     |        |
| Black                           | 1.42 (1.35 to 1.50) | <0.001 | 1.34 (1.29 to 1.39) | <0.001 |
| Others <sup>a</sup>             | 0.91 (0.85 to 0.96) | 0.002  | 0.82 (0.78 to 0.86) | <0.001 |
| White                           | Reference           |        |                     |        |
| <b>Marital status</b>           |                     |        |                     |        |
| Married                         | 0.81 (0.78 to 0.84) | <0.001 | 0.65 (0.64 to 0.67) | <0.001 |
| Unmarried <sup>b</sup>          | Reference           |        |                     |        |
| <b>Grade</b>                    |                     |        |                     |        |
| 1                               | 0.51 (0.48 to 0.55) | <0.001 | 0.82 (0.79 to 0.85) | <0.001 |
| 2                               | Reference           |        |                     |        |
| 3 and UD <sup>c</sup>           | 1.62 (1.56 to 1.68) | <0.001 | 1.30 (1.26 to 1.33) | <0.001 |
| <b>Tumor size (cm)</b>          |                     |        |                     |        |
| <2                              | 0.46 (0.44 to 0.48) | <0.001 | 0.64 (0.62 to 0.66) | <0.001 |
| 2-5                             | Reference           |        |                     |        |
| >5                              | 1.45 (1.39 to 1.52) | <0.001 | 1.42 (1.36 to 1.48) | <0.001 |
| <b>Positive nodes</b>           |                     |        |                     |        |
| 0                               | 0.29 (0.27 to 0.30) | <0.001 | 0.46 (0.44 to 0.47) | <0.001 |
| 1-3                             | 0.56 (0.53 to 0.59) | <0.001 | 0.61 (0.59 to 0.64) | <0.001 |
| 4-9                             | Reference           |        |                     |        |
| ≥10                             | 1.42 (1.34 to 1.49) | <0.001 | 1.48 (1.41 to 1.54) | <0.001 |
| <b>PR status</b>                |                     |        |                     |        |
| Negative                        | 1.41 (1.35 to 1.47) | <0.001 | 1.24 (1.20 to 1.27) | <0.001 |
| Positive                        | Reference           |        |                     |        |
| <b>Radiation</b>                |                     |        |                     |        |
| No                              | 1.17 (1.13 to 1.21) | <0.001 | 1.32 (1.29 to 1.36) | <0.001 |
| Yes                             | Reference           |        |                     |        |
| <b>Surgery type</b>             |                     |        |                     |        |
| No                              | 1.41 (1.27 to 1.57) | <0.001 | 1.23 (1.13 to 1.35) | <0.001 |
| Lumpectomy                      | 0.84 (0.81 to 0.87) | <0.001 | 0.86 (0.84 to 0.89) | <0.001 |
| Mastectomy                      | Reference           |        |                     |        |

**Note:**

a Including American Indian/Alaskan native, and Asian/Pacific Islander, and others-unspecified.

b Including divorced, separated, single (never married), and widowed.

c Including grade 3 and undifferentiated.

**Abbreviations:** BCSS: breast cancer specific survival; OS: overall survival; HR: hazard ratio; CI: confidence interval; IDC-L: invasive ductal carcinoma with lobular features; IDC: invasive ductal carcinoma; ILC: invasive lobular carcinoma; ER: estrogen receptor; PR: progesterone receptor.

**Supplementary Table 3. Multivariate Analysis of Breast Cancer Specific Survival (BCSS) and Overall**

**Survival (OS) Predictors in ER-negative Patients Using Cox Proportional Hazards Model**

| Variables                       | BCSS                |        | OS                  |        |
|---------------------------------|---------------------|--------|---------------------|--------|
|                                 | HR (95% CI)         | P      | HR (95% CI)         | P      |
| <b>Histological type</b>        |                     |        |                     |        |
| IDC-L versus IDC                | 1.13 (1.01 to 1.26) | 0.030  | 1.11 (1.01 to 1.23) | 0.031  |
| IDC-L versus ILC                | 1.00 (0.83 to 1.22) | 0.980  | 0.96 (0.81 to 1.13) | 0.628  |
| <b>Year of diagnosis</b>        |                     |        |                     |        |
| 1998-2002                       | 1.28 (1.23 to 1.33) | <0.001 | 1.26 (1.22 to 1.31) | <0.001 |
| 2003-2007                       | Reference           |        |                     |        |
| <b>Age at diagnosis (years)</b> |                     |        |                     |        |
| ≤50                             | 0.91 (0.87 to 0.95) | <0.001 | 0.71 (0.68 to 0.73) | <0.001 |
| >50                             | Reference           |        |                     |        |
| <b>Race</b>                     |                     |        |                     |        |
| Black                           | 1.20 (1.14 to 1.26) | <0.001 | 1.21 (1.15 to 1.26) | <0.001 |
| Others <sup>a</sup>             | 0.82 (0.76 to 0.89) | <0.001 | 0.80 (0.74 to 0.85) | <0.001 |
| White                           | Reference           |        |                     |        |
| <b>Marital status</b>           |                     |        |                     |        |
| Married                         | 0.84 (0.80 to 0.87) | <0.001 | 0.77 (0.74 to 0.79) | <0.001 |
| Unmarried <sup>b</sup>          | Reference           |        |                     |        |
| <b>Grade</b>                    |                     |        |                     |        |
| 1                               | 0.58 (0.47 to 0.70) | <0.001 | 0.74 (0.64 to 0.85) | <0.001 |
| 2                               | Reference           |        |                     |        |
| 3 and UD <sup>c</sup>           | 1.16 (1.10 to 1.23) | <0.001 | 1.08 (1.03 to 1.13) | <0.001 |
| <b>Tumor size (cm)</b>          |                     |        |                     |        |
| <2                              | 0.55 (0.52 to 0.58) | <0.001 | 0.63 (0.60 to 0.65) | <0.001 |
| 2-5                             | Reference           |        |                     |        |
| >5                              | 1.66 (1.57 to 1.75) | <0.001 | 1.59 (1.51 to 1.67) | <0.001 |
| <b>Positive nodes</b>           |                     |        |                     |        |
| 0                               | 0.30 (0.28 to 0.32) | <0.001 | 0.37 (0.35 to 0.39) | <0.001 |
| 1-3                             | 0.59 (0.55 to 0.62) | <0.001 | 0.60 (0.57 to 0.64) | <0.001 |
| 4-9                             | Reference           |        |                     |        |
| ≥10                             | 1.33 (1.24 to 1.33) | <0.001 | 1.24 (1.17 to 1.32) | <0.001 |
| <b>PR status</b>                |                     |        |                     |        |
| Negative                        | 1.20 (1.10 to 1.30) | <0.001 | 1.17 (1.09 to 1.26) | <0.001 |
| Positive                        | Reference           |        |                     |        |
| <b>Radiation</b>                |                     |        |                     |        |
| No                              | 1.15 (1.10 to 1.20) | <0.001 | 1.24 (1.19 to 1.29) | <0.001 |
| Yes                             | Reference           |        |                     |        |
| <b>Surgery type</b>             |                     |        |                     |        |
| No                              | 1.45 (1.29 to 1.63) | <0.001 | 1.49 (1.34 to 1.65) | <0.001 |
| Lumpectomy                      | 0.88 (0.84 to 0.92) | <0.001 | 0.88 (0.85 to 0.92) | <0.001 |
| Mastectomy                      | Reference           |        |                     |        |

**Note:**

a Including American Indian/Alaskan native, and Asian/Pacific Islander, and others-unspecified.

b Including divorced, separated, single (never married), and widowed.

c Including grade 3 and undifferentiated.

**Abbreviations:** BCSS: breast cancer specific survival; OS: overall survival; HR: hazard ratio; CI: confidence interval; IDC-L: invasive ductal carcinoma with lobular features; IDC: invasive ductal carcinoma; ILC: invasive lobular carcinoma; ER: estrogen receptor; PR: progesterone receptor.
